# Supplementary material for: Late Post-Operative Occurrence of Dentin Hypersensitivity in Adult Patients Following Allogeneic Hematopoietic Stem Cell Transplantation—A Preliminary Report
Source: MDPI journal article supplement (doi:10.3390/ijerph18168761), 2021-08-19
Supplement: s1 [file s1]

## DENTAL RECORD CARD

IDENTIFICATION NO. \_\_\_\_\_

AGE \_\_\_\_\_ SEX **F** **M**

PROFESSION: \_\_\_\_\_

### 1. GENERAL MEDICAL HISTORY.

Diagnosis (underlying pathology): \_\_\_\_\_

Date of HCT: \_\_\_\_\_

Date of dental examination: \_\_\_\_\_

Graft type:

1. alloHCT ☐  
2. autoHCT ☐

Type of conditioning therapy before HCT

1. Radiotherapy (TBI) ☐ 2. Chemotherapy ☐

Comorbidities:

GvHD disease (type):

Medications currently being taken:

### 2. DENTAL SELF-REPORT.

#### Pain conditions

Severity of pain (verbal scale) ☐ no pain ☐ mild ☐ moderate ☐ severe

VAS scale:

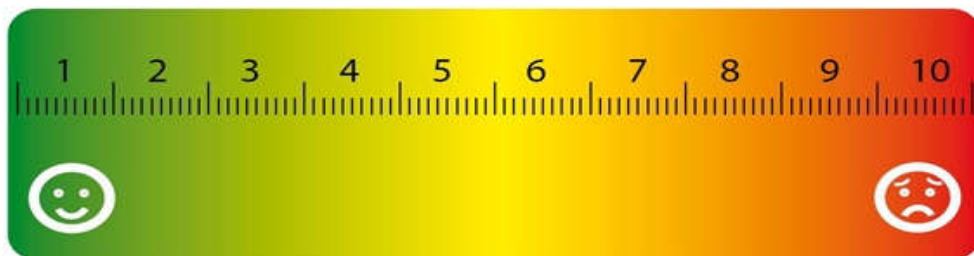

Which teeth are affected? \_\_\_\_\_

What other parts of the oral cavity/throat are affected?

☐ lips ☐ cheeks ☐ palate ☐ gums ☐ tongue ☐ throat

What regions of the face are affected?

☐ lips ☐ cheeks ☐ nose ☐ forehead ☐ chin ☐ eye ☐ other

How long does the pain last? \_\_\_\_\_

What causes the pain? ☐ cold ☐ heat ☐ sweet ☐ sour ☐ touch

What relieves the pain? ☐ cold ☐ heat ☐ touch ☐ other

Pain description:

☐ dull ☐ sharp ☐ throbbing ☐ spontaneous ☐ intermittent ☐ constant ☐ other

|                                   |                             |                              |
|-----------------------------------|-----------------------------|------------------------------|
| Problems with eating cold food    | <input type="checkbox"/> no | <input type="checkbox"/> yes |
| The need for cutting fruits       | <input type="checkbox"/> no | <input type="checkbox"/> yes |
| Careful when breathing            | <input type="checkbox"/> no | <input type="checkbox"/> yes |
| Avoiding some teeth when eating   | <input type="checkbox"/> no | <input type="checkbox"/> yes |
| Avoiding some teeth when brushing | <input type="checkbox"/> no | <input type="checkbox"/> yes |

Type of pain

- Pain indicative of **dentin hypersensitivity** ☐ no ☐ yes
- Pain indicative of **pulpitis** ☐ no ☐ yes
- Pain indicative of **periodontal disease** ☐ no ☐ yes
- Pain indicative **neuropathic origin** ☐ no ☐ yes
- Other ☐ no ☐ yes

### Dry mouth

**A sensation of dry mouth** 0 (none) 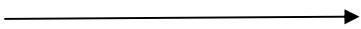 10 (maximum severity)

How long has the patient been complaining of the condition? \_\_\_\_\_

**Difficulty in swallowing** 0 (none) 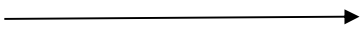 10 (maximum severity)

How long has the patient been complaining of the condition? \_\_\_\_\_

**Difficulty in speaking** 0 (none) 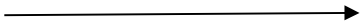 10 (maximum severity)

How long has the patient been complaining of the condition? \_\_\_\_\_

**A frequent need to drink** 0 (none) 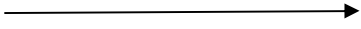 10 (maximum severity)

How long has the patient been complaining of the condition? \_\_\_\_\_

**Dry mouth at night** 0 (none) 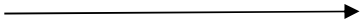 10 (maximum severity)

How long has the patient been complaining of the condition? \_\_\_\_\_

**Dysgeusia** 0 (none) 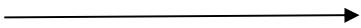 10 (maximum severity)

How long has the patient been complaining of the condition? \_\_\_\_\_

Kind of dysgeusia: ☐ ageusia ☐ everything seems sweet ☐ sour ☐ bitter ☐ metallic

**A burning mouth sensation** 0 (none)  10 (maximum severity)

How long has the patient been complaining of the condition? \_\_\_\_\_

**A change in voice tone** 0 (none) 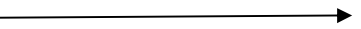 10 (maximum severity)

How long has the patient been complaining of the condition? \_\_\_\_\_

**Halitosis** 0 (none) 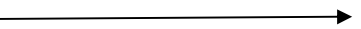 10 (maximum severity)

How long has the patient been complaining of the condition? \_\_\_\_\_

**Recurrent angular cheilitis**    0 (none)    \_\_\_\_\_ →    10 (maximum severity)

How often does the patient complain of the condition? \_\_\_\_\_

**Recurrent oral candidiasis**    0 (none)    \_\_\_\_\_ →    10 (maximum severity)

How often does the patient complain of the condition? \_\_\_\_\_

**Gum/periodontal disease**

Bleeding when brushing teeth/flossing    ☐ no    ☐ yes

Retention of food in the interdental spaces    ☐ no    ☐ yes

Tooth mobility    ☐ no    ☐ yes

Gum recessions    ☐ no    ☐ yes

**Oral hygiene and preventative care**

Number of meals per day \_\_\_\_\_

Most frequently consumed beverage \_\_\_\_\_

How many times does the patient brush the teeth a day? \_\_\_\_\_

Kind of toothbrush:    ☐ manual    ☐ electric    ☐ sonic  
                                 ☐ ultra - soft    ☐ soft    ☐ medium    ☐ hard

Type of toothpaste used    ☐ with fluoride    ☐ without fluoride    ☐ high fluoride concentration  
                                 ☐ smoker's    ☐ teeth-whitening    ☐ sensitivity  
                                 ☐ herbal    ☐ children's    ☐ tartar-control

Other methods of oral care    ☐ dental floss    ☐ dental picks/sticks    ☐ oral irrigator  
                                 ☐ tongue scrapers    ☐ other \_\_\_\_\_

Methods and measures for combatting dry mouth    ☐ mouthwash \_\_\_\_\_  
                                 ☐ oral gel \_\_\_\_\_  
                                 ☐ moisturising spray \_\_\_\_\_  
                                 ☐ artificial saliva \_\_\_\_\_  
                                 ☐ chewing gum \_\_\_\_\_  
                                 ☐ sweets \_\_\_\_\_  
                                 ☐ other \_\_\_\_\_

Frequency of dental visits (a year) \_\_\_\_\_

**Stimulants and habits**

**Coffee** ☐ no ☐ yes

How often a day? \_\_\_\_\_

**Strong tea** ☐ no ☐ yes

How often a day? \_\_\_\_\_

**Tobacco** ☐ no ☐ yes

How often a day? \_\_\_\_\_

**Alcohol** ☐ no ☐ yes

How often? ☐ every day ☐ occasionally

**Drugs** ☐ no ☐ yes

How often? ☐ every day ☐ occasionally

Does the patient have any oral habits e.g. biting ice, biting nails, using teeth to hold objects? ☐ no ☐ yes

Does the patient grit their teeth during the day or cause them pain? ☐ no ☐ yes

Has the patient been diagnosed with bruxism? ☐ no ☐ yes

**Prosthetic restorations/orthodontic treatment****Removable dentures:**

☐ upper ☐ partial ☐ complete

☐ lower ☐ partial ☐ complete

☐ acrylic tissue-supported dentures

☐ dentures with cast metal frameworks

☐ dentures with cast metal frameworks and (semi)precision attachments

☐ other

Worn since \_\_\_\_\_

Does the patient remove dentures at night ☐ no ☐ yes

How does the patient clean the dentures? ☐ water ☐ soap ☐ toothpaste ☐ special cleaners

**Orthodontic/occlusal appliances:**

☐ upper ☐ fixed ☐ removable

☐ lower ☐ fixed ☐ removable

☐ splints

☐ other \_\_\_\_\_

Worn since \_\_\_\_\_

### 3. CLINICAL ORAL EXAMINATION.

#### Extraoral examination

Limited mouth opening ☐ no ☐ yes (mm) \_\_\_\_\_  
Pain when opening ☐ no ☐ yes  
Cracks on lips ☐ no ☐ yes  
Angular stomatitis ☐ no ☐ yes  
Other symptoms \_\_\_\_\_

#### Intraoral examination

##### Oral mucosa changes:

☐ reticular pattern ☐ papular changes ☐ hypertrophic lesions  
☐ erythematous spots ☐ white spots ecchymosis ☐ erosions and/or ulcers  
☐ epithelial exfoliation ☐ mucocele ☐ other cysts  
☐ scars  
☐ other changes \_\_\_\_\_

Location \_\_\_\_\_

##### Oral mucosa hydration:

☐ 1° - correct hydration  
☐ 2° - moderate dehydration  
☐ 3° - severe dehydration

**Tongue:** ☐ correct colour ☐ vivid ☐ red colour ☐ bluish  
☐ dry ☐ moist ☐ swollen ☐ scalloped  
☐ white coating ☐ black coating ☐ disappearance of filiform (filamentous) warts  
☐ erosions/ulcers ☐ fissures ☐ pseudomembranous slough  
☐ limited mobility

**Salivary ducts:** ☐ swelling ☐ erythema ☐ pain

**Periodontal status:** ([www.periodontalchart-online.com](http://www.periodontalchart-online.com), Department of Periodontology, University of Bern, Switzerland)

##### Dentin hypersensitivity chart (DH):

|              |    |    |    |    |    |    |    |    |    |    |    |    |    |    |    |    |
|--------------|----|----|----|----|----|----|----|----|----|----|----|----|----|----|----|----|
| Cold air     |    |    |    |    |    |    |    |    |    |    |    |    |    |    |    |    |
| Dental probe |    |    |    |    |    |    |    |    |    |    |    |    |    |    |    |    |
| Tooth        | 18 | 17 | 16 | 15 | 14 | 13 | 12 | 11 | 21 | 22 | 23 | 24 | 25 | 26 | 27 | 28 |
| Tooth        | 48 | 47 | 46 | 45 | 44 | 43 | 42 | 41 | 31 | 32 | 33 | 34 | 35 | 36 | 37 | 38 |
| Dental probe |    |    |    |    |    |    |    |    |    |    |    |    |    |    |    |    |
| Cold air     |    |    |    |    |    |    |    |    |    |    |    |    |    |    |    |    |

0-no pain

1-discomfort

2-pain occurs with stimulus but resolves when it is removed

3-pain lasts after removal of stimulus

# Dental chart:

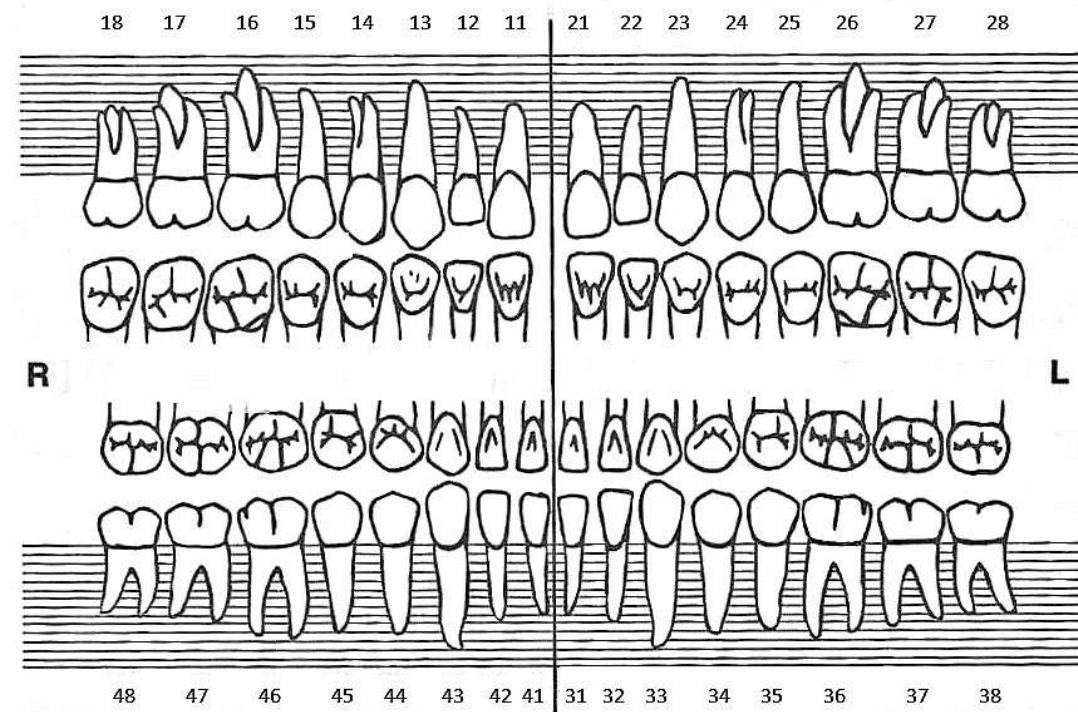

- 1 – initial caries
- 2 – caries
- 3 – non-carious lesion
- 4 – filling
- 5 – tooth extracted due to caries
- 6 – tooth extracted for other reasons
- 7 – fissure sealant
- 9 – partially erupted tooth
- 9 – trauma

## Saliva

### Appearance of saliva:

- ☐ correct appearance and quantity
- ☐ correct appearance but low quantity
- ☐ frothy and low quantity; cloudy; stretchy

### Saliva secretion:

|                        |  |
|------------------------|--|
| Resting saliva [ml]    |  |
| Stimulated saliva [ml] |  |
